# Supplementary material
Source: PubMed Central journal article supplement (PMC6555859)
Supplement: BPH-176-2209-s007.pdf [file BPH-176-2209-s007.pdf]

## **Supporting Information**

### **Phosphodiesterase-4 inhibition attenuates murine ulcerative colitis via interfering with mucosal immunity**

Heng Li<sup>1,2</sup>, Chen Fan<sup>1</sup>, Chunlan Feng<sup>1</sup>, Yanwei Wu<sup>1</sup>, Huimin Lu<sup>1,2</sup>, Peilan He<sup>3</sup>, Xiaoqian Yang<sup>3</sup>, Fenghua Zhu<sup>3</sup>, Qing Qi<sup>1</sup>, Yuanzhuo Gao<sup>1,2</sup>, Jianping Zuo<sup>2,3\*</sup>, Wei Tang<sup>1,2\*</sup>

1 Laboratory of Anti-inflammation, Shanghai Institute of Materia Medica, Chinese Academy of Sciences, Shanghai 201203, China

2 School of Pharmacy, University of Chinese Academy of Sciences, Beijing 100049, China

3 Laboratory of Immunopharmacology, State Key Laboratory of Drug Research, Shanghai Institute of Materia Medica, Chinese Academy of Sciences, Shanghai 201203, China

\* Correspondence. Wei Tang and Jianping Zuo, Shanghai Institute of Materia Medica, Chinese Academy of Sciences, Shanghai 201203, China. E-mail address: tangwei@simm.ac.cn and jpzuo@simm.ac.cn

### **DSS-induced colitis and drug treatment**

Wide-type male C57BL/6J mice (8 weeks, 22-24g) were purchased from Shanghai Lingchang Biotechnology Co., Ltd. (Certificate No.2013-0018, China). The mice were housed under specific pathogen-free conditions with 12 h of light/12 h of dark cycle,  $22\pm 1$  °C and  $55\pm 5\%$  relative humidity. All mice were fed standard laboratory chow and water ad libitum and allowed to acclimatize in our facility for one week before any experiments started.

Mice were randomly divided into 5 groups, consisting of normal mice, normal mice treated with  $50\text{ mg}\cdot\text{kg}^{-1}$  apremilast, vehicle (DSS only), vehicle treated with  $50\text{ mg}\cdot\text{kg}^{-1}$  or  $10\text{ mg}\cdot\text{kg}^{-1}$  apremilast. Ulcerative colitis was induced by administration of 3% DSS for 7 days and further drinking water taken for another 4 days. During the treatment, weight loss, stool consistency and fecal blood, as indicators of disease activity index (DAI), were monitored by 3 investigators who were blinded to the experimental conditions. The DAI scores were calculated as the sum of the weight loss, stool consistency and rectal bleeding score shown in Table1. On day 11, mice were anesthetized with an intraperitoneal injection of 4% chloral hydrate. The spleen and colon were isolated for further measurement.

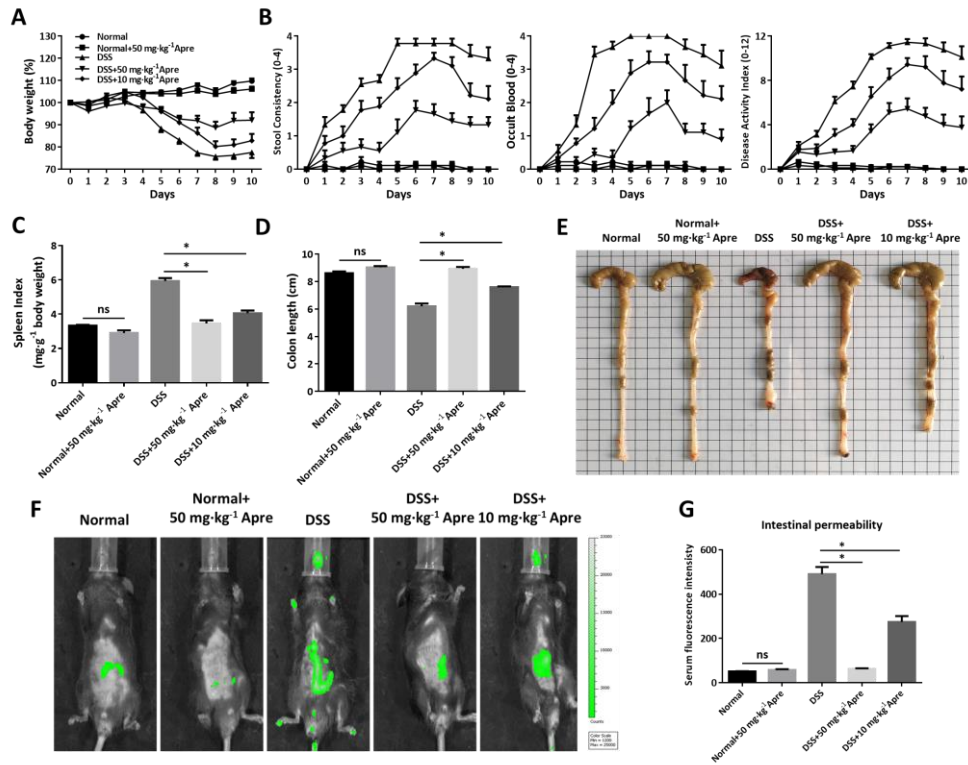

**Figure S1.** Apremilast dose-dependently attenuated DSS-induced ulcerative colitis without inflammation in control mice. (A) The percentage of body weight change during treatment. (B) The score of stool consistency and occult blood and DAI based on the criteria in Table1. (C) Spleen index calculated by spleen weight (mg)/body weight. (D) Colon length. (E) Representative colon images. (F) Fluorescence imaging with FITC-dextran administration and (G) serum fluorescence intensity. Data were shown as means±SEM; n=9 per group. \*p<0.05, significantly different from vehicle group.

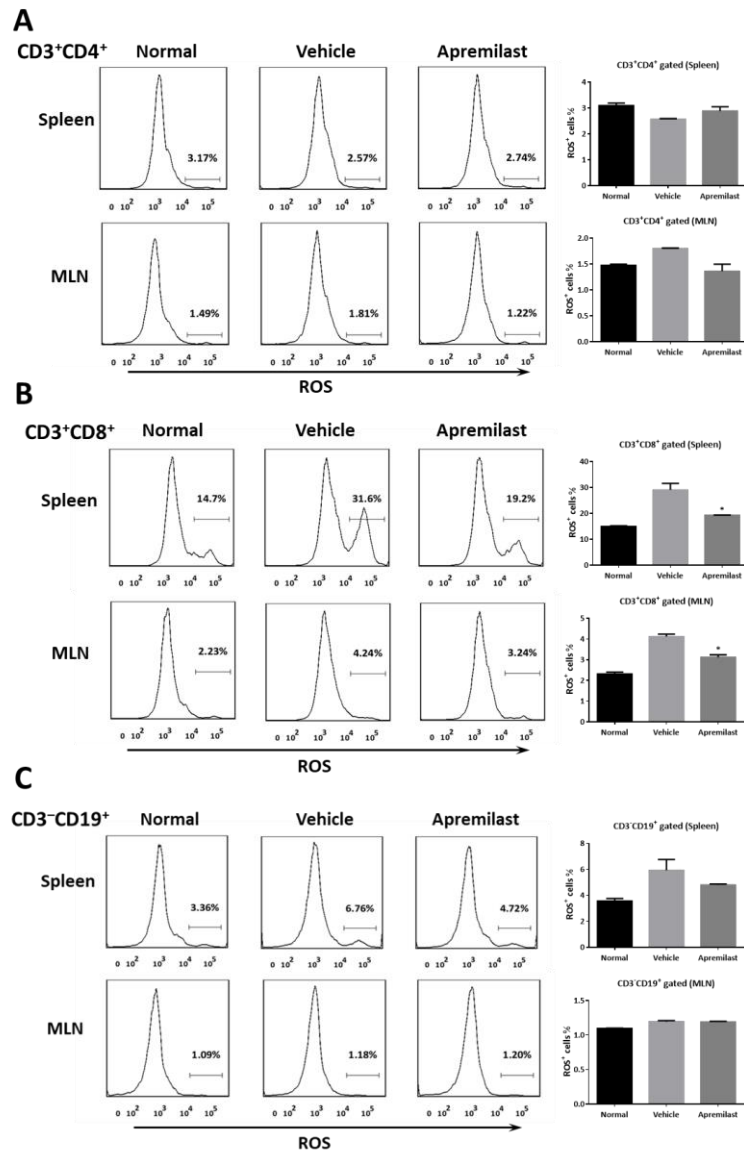

**Figure S2.** Flow cytometry analysis of ROS production from CD3<sup>+</sup>CD4<sup>+</sup> (A), CD3<sup>+</sup>CD8<sup>+</sup> (B), CD3<sup>+</sup>CD19<sup>+</sup> (C) cells in spleen and mesenteric lymph nodes. Colitis was induced with 3% DSS as described in Methods. Splenocytes and mesenteric lymph node cells were isolated and labeled with fluorescent antibodies. Data correspond to experiments conducted on 8 mice.

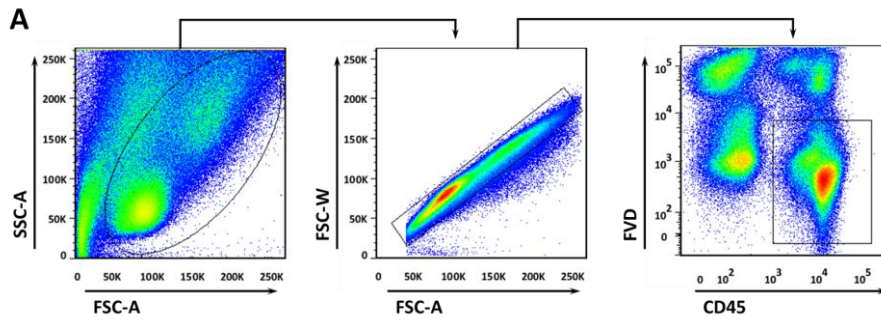

**Figure S3.** The gating strategy of flow cytometry. FSC-A plus SSC-A was used to identify the total cells for analysis. FSC-A plus FSC-W were used to identify the singlets. Subsequently, CD45<sup>+</sup>FVD<sup>int</sup> cells were considered as living leukocytes for the further analysis.

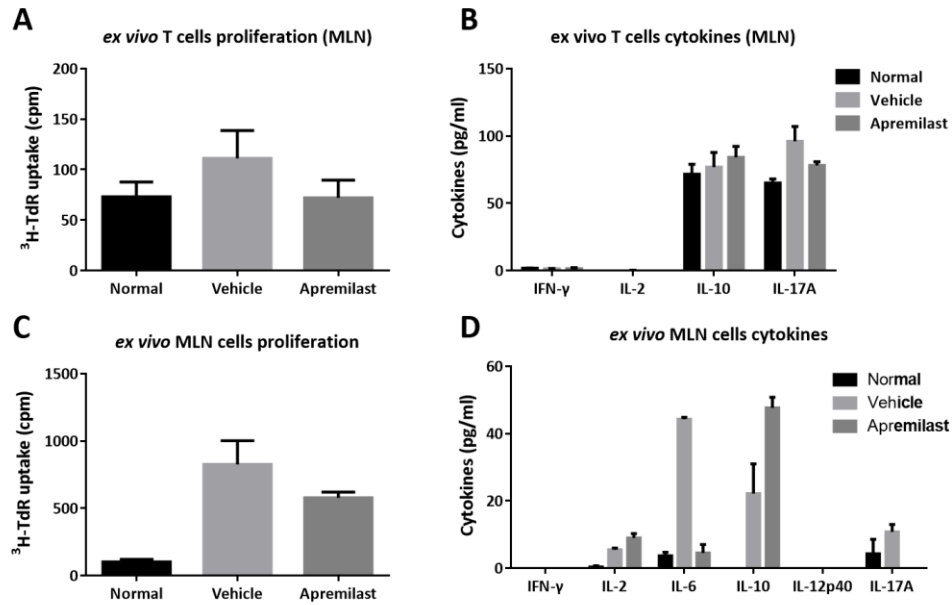

**Figure S4.** Baseline proliferation and cytokines release from CD4<sup>+</sup> T cell and whole MLN cells. CD4<sup>+</sup> T cells (A, and B), purified from MLNs, and whole MLN cells (C, and D) were cultured to measure the basal proliferation and cytokines levels in accord with Figure 5. Data were shown as means±SEM; n=8 per group.

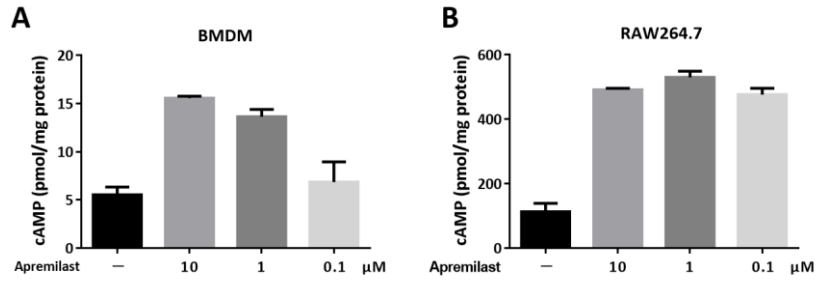

**Figure S5.** Effect of apremilast on cAMP elevation in BMDMs and macrophages. BMDMs and RAW264.7 cells were incubated with the indicated concentrations (10, 1, or 0.1  $\mu\text{M}$ ) of apremilast for 30 min. cAMP levels in BMDMs (A) and RAW264.7 cells (B) were detected by ELISA. Data were shown as means $\pm$ SEM of three independent experiments.

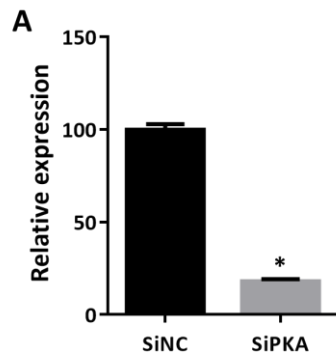

**Figure S6.** The percentage of knockdown for PKA C- $\alpha$ .



Table S1. Sequences of primers used for quantitative real-time PCR

| Gene      |         | Sequence 5'-3'           |
|-----------|---------|--------------------------|
| β-actin   | Forward | GGCTGTATTCCCCTCCATCG     |
|           | Reverse | CCAGTTGGTAACAATGCCATGT   |
| Tnf-α     | Forward | CCCTCACACTCAGATCATCTTCT  |
|           | Reverse | GCTACGACGTGGGCTACAG      |
| Ifn-γ     | Forward | GCCACGGCACAGTCATTGA      |
|           | Reverse | TGCTGATGGCCTGATTGTCTT    |
| Il-1β     | Forward | GCAACTGTTTCCTGAACTCAACT  |
|           | Reverse | ATCTTTTGGGGTCCGTCAACT    |
| Il-2      | Forward | TGAGCAGGATGGAGAATTACAGG  |
|           | Reverse | GTCCAAGTTCATCTTCTAGGCAC  |
| Il-6      | Forward | TAGTCCTTCCCTACCCCAATTTCC |
|           | Reverse | TTGGTCCTTAGCCACTCCTTC    |
| Il-10     | Forward | GCTCTTACTGACTGGCATGAG    |
|           | Reverse | CGCAGCTCTAGGAGCATGTG     |
| Il-12p40  | Forward | TGGTTTGCCATCGTTTTGCTG    |
|           | Reverse | ACAGGTGAGGTTCACTGTTTCT   |
| Il-17a    | Forward | TTTAACTCCCTTGGCGCAAAA    |
|           | Reverse | CTTCCCTCCGCATTGACAC      |
| Il-23     | Forward | ATGCTGGATTGCAGAGCAGTA    |
|           | Reverse | ACGGGGCACATTATTTTTAGTCT  |
| Inos      | Forward | AAGTCAAATCCTACCAAAGTGA   |
|           | Reverse | CCATAATACTGGTTGATGAACT   |
| Cox-2     | Forward | GGGTGTGAAGGGAAATAAGG     |
|           | Reverse | TCTCCACCAATGACCTGAT      |
| Nlrp3     | Forward | ATTACCCGCCCGAGAAAGG      |
|           | Reverse | TCGCAGCAAAGATCCACACAG    |
| Asc       | Forward | CTTGTCAGGGGATGAACTCAAAA  |
|           | Reverse | GCCATACGACTCCAGATAGTAGC  |
| Caspase-1 | Forward | ACAAGGCACGGGACCTATG      |
|           | Reverse | TCCCAGTCAGTCCTGGAAATG    |
| Il-18     | Forward | GACTCTTGCGTCAACTTCAAGG   |
|           | Reverse | CAGGCTGTCTTTTGTC AACGA   |

---

|            |         |                         |
|------------|---------|-------------------------|
| Zo-1       | Forward | GCCGCTAAGAGCACAGCAA     |
|            | Reverse | TCCCCACTCTGAAAATGAGGA   |
| E-cadherin | Forward | CAGGTCTCCTCATGGCTTTGC   |
|            | Reverse | CTTCCGAAAAGAAGGCTGTCC   |
| Occludin   | Forward | TTGAAAGTCCACCTCCTTACAGA |
|            | Reverse | CCGGATAAAAAGAGTACGCTGG  |
| Mmp2       | Forward | CAAGTTCCCCGGCGATGTC     |
|            | Reverse | TTCTGGTCAAGGTCACCTGTC   |
| Mmp3       | Forward | ACATGGAGACTTTGTCCCTTTTG |
|            | Reverse | TTGGCTGAGTGGTAGAGTCCC   |
| Mmp9       | Forward | CTGGACAGCCAGACACTAAAG   |
|            | Reverse | CTCGCGGCAAGTCTTCAGAG    |
| Ccr2       | Forward | ATCCACGGCATACTATCAACATC |
|            | Reverse | CAAGGCTCACCATCATCGTAG   |
| Ccr4       | Forward | GGAAGGTATCAAGGCATTTGGG  |
|            | Reverse | GTACACGTCCGTCATGGACTT   |
| Ccr5       | Forward | TTTTCAAGGGTCAGTTCCGAC   |
|            | Reverse | GGAAGACCATCATGTTACCCAC  |
| Ccr6       | Forward | CCTGGGCAACATTATGGTGGT   |
|            | Reverse | CAGAACGGTAGGGTGAGGACA   |
| Ccr9       | Forward | CTTCAGCTATGACTCCACTGC   |
|            | Reverse | CAAGGTGCCACAATGAACA     |
| Cxcr2      | Forward | ATGCCCTCTATTCTGCCAGAT   |
|            | Reverse | GTGCTCCGGTTGTATAAGATGAC |
| Cxcr3      | Forward | TACCTTGAGGTTAGTGAACGTCA |
|            | Reverse | CGCTCTCGTTTTCCCATAATC   |
| Icam       | Forward | GTGATGCTCAGGTATCCATCCA  |
|            | Reverse | CACAGTTCTCAAAGCACAGCG   |
| Ip-10      | Forward | CCAAGTGCTGCCGTCATTTTC   |
|            | Reverse | GGCTCGCAGGGATGATTTCAA   |
| Kc         | Forward | CTGGGATTCACCTCAAGAACATC |
|            | Reverse | CAGGGTCAAGGCAAGCCTC     |
| Mcp-1      | Forward | TTAAAACCTGGATCGGAACCAA  |
|            | Reverse | GCATTAGCTTCAGATTTACGGGT |

---

---

|                |         |                         |
|----------------|---------|-------------------------|
| Mdc            | Forward | AGGTCCTATGGTGCCAATGT    |
|                | Reverse | CGGCAGGATTTTGAGGTCCA    |
| Mig            | Forward | TCCTTTTGGGCATCATCTTCC   |
|                | Reverse | TTTGTAGTGGATCGTGCCTCG   |
| Mip-1 $\alpha$ | Forward | TTCTCTGTACCATGACACTCTGC |
|                | Reverse | CGTGAATCTTCCGGCTGTAG    |
| Mip-1 $\beta$  | Forward | TTCCTGCTGTTTCTCTTACACCT |
|                | Reverse | CTGTCTGCCTCTTTTGGTCAG   |
| Mip-3 $\alpha$ | Forward | ACTGTTGCCTCTCGTACATAACA |
|                | Reverse | GAGGAGGTTACAGCCCTTTT    |
| Rantes         | Forward | GCTGCTTTGCCTACCTCTCC    |
|                | Reverse | TCGAGTGACAAACACGACTGC   |
| Osm            | Forward | ATGCAGACACGGCTTCTAAGA   |
|                | Reverse | TTGGAGCAGCCACGATTGG     |
| Osmr           | Forward | CATCCCGAAGCGAAGTCTTGG   |
|                | Reverse | GGCTGGGACAGTCCATTCTAAA  |
| Fap            | Forward | GTCACCTGATCGGCAATTTGT   |
|                | Reverse | CCCCATTCTGAAGGTCGTAGAT  |
| Pdpn           | Forward | ACCGTGCCAGTGTTGTTCTG    |
|                | Reverse | AGCACCTGTGGTTGTTATTTTGT |
| Coll1a1        | Forward | GTCCTCTTAGGGGCCACT      |
|                | Reverse | CCACGTCTCACCATTGGGG     |
| Pde4a          | Forward | GAACCGGGAACTCACACACC    |
|                | Reverse | GTACTCTGAGACCTGGTTTCCT  |
| Pde4b          | Forward | CGCAGGGAGTCGTTCTCTA     |
|                | Reverse | CTCCTGTGGTCGCACACTTG    |
| Pde4c          | Forward | TCCGAGAGCCAGTGGATTCT    |
|                | Reverse | CCTTGAGTTCCAATCGTGAAGAC |
| Pde4d          | Forward | TTTTGCCAGTGCAATACATGATG |
|                | Reverse | CAGAGCGAGTCCGAGTTTGT    |

---

Table S2. Antibodies for immunoblotting

| <b>Antibody</b>              | <b>Source</b> | <b>Vendor</b>             | <b>Catalog No.</b> |
|------------------------------|---------------|---------------------------|--------------------|
| anti-Occludin                | Rabbit        | Thermo Fisher Scientific  | 71-1500            |
| anti-ZO-1                    | Rabbit        | Proteintech               | 21773-1-AP         |
| anti- $\alpha$ Tubulin       | Mouse         | Proteintech               | HRP-66031          |
| anti-SOCS3                   | Rabbit        | Proteintech               | 14025-1-AP         |
| anti-PDE4D                   | Rabbit        | Proteintech               | 12918-1-AP         |
| anti-PDE4C                   | Rabbit        | Proteintech               | 21754-1-AP         |
| anti-PDE4A                   | Rabbit        | Proteintech               | 16226-1-AP         |
| anti-E-cadherin              | Rabbit        | Cell Signaling Technology | 3195               |
| anti-PDE4B                   | Rabbit        | Cell Signaling Technology | 72096              |
| anti-Rap1A/Rap1B             | Rabbit        | Cell Signaling Technology | 4938               |
| anti-Epac1                   | Mouse         | Cell Signaling Technology | 4155               |
| anti-EPAC2                   | Mouse         | Cell Signaling Technology | 4156               |
| anti-p-CREB                  | Rabbit        | Cell Signaling Technology | 9198               |
| anti-CREB                    | Mouse         | Cell Signaling Technology | 9104               |
| anti-PKA C- $\alpha$         | Rabbit        | Cell Signaling Technology | 5842               |
| anti-p-stat3                 | Rabbit        | Cell Signaling Technology | 98543              |
| anti-p-I $\kappa$ B $\alpha$ | Mouse         | Cell Signaling Technology | 9246               |
| anti-p-p38                   | Rabbit        | Cell Signaling Technology | 9215               |
| anti-I $\kappa$ B $\alpha$   | Rabbit        | Cell Signaling Technology | 4812               |
| anti-p-NF- $\kappa$ B        | Rabbit        | Cell Signaling Technology | 4806               |
| anti-p65                     | Rabbit        | Cell Signaling Technology | 4764               |
| anti-p-SAPK/JNK              | Rabbit        | Cell Signaling Technology | 4671               |
| anti-p-Akt                   | Rabbit        | Cell Signaling Technology | 4056               |
| anti-SAPK/JNK                | Rabbit        | Cell Signaling Technology | 9252               |
| anti-p38                     | Rabbit        | Cell Signaling Technology | 8690               |
| anti-HMGB1                   | Rabbit        | Cell Signaling Technology | 6893               |
| anti-p44/42                  | Rabbit        | Cell Signaling Technology | 4695               |
| anti-p-p44/42                | Rabbit        | Cell Signaling Technology | 4377               |
| anti-Akt                     | Rabbit        | Cell Signaling Technology | 9272               |
| anti-Stat5                   | Rabbit        | Cell Signaling Technology | 94205              |
| anti-p-Stat5                 | Rabbit        | Cell Signaling Technology | 9351               |
| anti-Stat4                   | Rabbit        | Cell Signaling Technology | 2653               |

---

|                     |        |                           |       |
|---------------------|--------|---------------------------|-------|
| anti-p-Stat4        | Rabbit | Cell Signaling Technology | 5267  |
| anti-MyD88          | Rabbit | Cell Signaling Technology | 4283  |
| anti-Stat6          | Rabbit | Cell Signaling Technology | 9362  |
| anti-p-Stat6        | Rabbit | Cell Signaling Technology | 56554 |
| anti-Stat1          | Rabbit | Cell Signaling Technology | 9172  |
| anti-p-Stat1        | Rabbit | Cell Signaling Technology | 7649  |
| anti-Stat3          | Rabbit | Cell Signaling Technology | 4904  |
| anti-p85            | Rabbit | Cell Signaling Technology | 4257  |
| anti-p-p85          | Rabbit | Cell Signaling Technology | 4228  |
| anti-p-mTOR         | Rabbit | Cell Signaling Technology | 5536  |
| anti-p-MEK1/2       | Rabbit | Cell Signaling Technology | 2338  |
| anti-p-IkB $\alpha$ | Rabbit | Cell Signaling Technology | 2859  |
| anti-mTOR           | Rabbit | Cell Signaling Technology | 2983  |
| anti-MEK1/2         | Rabbit | Cell Signaling Technology | 8727  |
| anti-IkB- $\alpha$  | Rabbit | Cell Signaling Technology | 9242  |

---
